# Supplementary material
Source: Research Square preprint supplement (doi:10.21203/rs.3.rs-9441998/v1)
Supplement: Supplementary file 1 [file 36cfbb5779f9a47f4b5d0244.docx]

**Supplementary File**

**Methods used for calculating RMSD:**

To evaluate the pose prediction accuracy across the various docking tools, Root Mean Square Deviation (RMSD) was calculated using the DockRMSD [PMID: 31175455] tool. RMSD values were computed between the heavy atoms of the generated poses and the native co-crystallised reference ligand.

**Table S1: PDB IDs included in CrossDocked2020 v1.3**

| **BACE1 PDB IDS** |
| --- |
| 5he7:60x,4l7j:1w2,3udy:09g,5hdu:60w,4h3i:10v,5f01:5t7,4i1c:1be,4h3j:10w,2qu3:462,4j0z:1h5,5hd0:60y,5htz:66j,5he4:60t,2ph8:35a,3rsv:3rs,4j17:1hq,4j1c:1ho,5hu1:66f,4b05:32d,3ufl:508,4rce:3ln,3udn:09b,4b77:54m,4b72:2fb,4l7h:1w1,4djv:0km,5ezx:5t5,3udq:09e,5he5:60s,4h3g:10q,4djy:0kr,4r92:3ku,5enm:5qu,3in3:472,2ze1:411,4fm8:0uq,3ivh:1li,4h1e:10j,3s7l:591,4i10:1bs,5ezz:5t6,4j0p:1h8,3udp:09d,5enk:5qv,4n00:2ex,4h3f:10o,4r95:3kw,4jp9:1m5,4zpg:4qf,4xkx:43k,4rrn:3uw,5hdx:60u,4j1e:1hm,4jpc:1m6,5f00:5t8,4x7i:3ys,4rcd:3ll,4hzt:0za,4r8y:3ko,4rro:3ux,3vv7:0b1,5hu0:66h,3l3a:625,4i0f:1bf,4fse:0va,3vf3:0gs,4djw:0kp,5hdv:60v,4rcf:3lo,4i0z:1bb,4fsl:0vb,4fm7:0up,4wtu:3ut,4i0e:1b8,3u6a:18p,3pi5:3p5,4i0d:1b7,4r91:3kt,5i3v:68m,3inh:569 |
| **AChE PDB IDS** |
| 4m0f:1yk,4ey5:hup,4ey6:gnt,4ey7:e20,4bdt:huw,4m0e:1yl,2x8b,5fpq,4ey8,4pqe,1f8u |
| **GSK-3β PDB IDS** |
| 4ptc:2we,3say:oft,1r0e:dfn,2ow3:bim,2jld:ag1,5oy4:b4k,3gb2:g3b,3du8:553,3i4b:z48,4j1r:i5r,3zrk:zrk,4afj:sjj,3q3b:55e,4nm3:adp,1q5k:tmu,2o5k:hbm,4b7t:cwt,,3l1s:z92,4ach:kdi,3zrl:zrl,1q41:ixm,5f95:3up,4iq6:iq6,4nu1:adp,4j71:1jx,5f94:3uo,6b8j:65c,3f88:3ht,4acc:7yg,4ptg:2wg,3pup:os1,1q3w:atu,3zdi:ugj,3m1s:dw1,4dit:0kd,1j1c:adp,1q3d:stu,1q4l:679,1pyx:anp,1j1b:anp,4acg:6lq,4acd:gr9,3sd0:tsk,4pte:2wf,5k5n:6qh,5hlp:65a,3f7z:34o,1o9u:adz,3zrm:zrm,1uv5:brw,1gng |

**Table S2: Cross-Docking RMSD of Best Scoring pose and Lowest RMSD Poses Across Three Targets: AChE, BACE1,**

**and GSKβ**

**Table S2: Cross-Docking COM-RMSD of Best Scoring pose and Lowest RMSD Poses Across Three Targets: AChE, BACE1, and GSKβ**

​​**Table S3: Re-Docking RMSD of Best Scoring pose and Lowest RMSD Across Three Targets: AChE, BACE1, and GSKβ**

**Table S4: Re-Docking COM-RMSD of Best Scoring pose and Lowest RMSD Across Three Targets: AChE, BACE1, and GSKβ**

*(All the files are attached as tables, because of their long size)*
